# Supplementary material for: Durability of SARS-CoV-2-specific T cell responses at 12-months post-infection
Source: bioRxiv or medRxiv preprint supplement (doi:10.1101/2021.08.11.455984), 2021-08-11
Supplement: Supplementary file [file media-1.pdf]

Table S1. Antibodies used for APC staining

| fluorochrome  | Antigen  | Vendor         | Cat#   |
|---------------|----------|----------------|--------|
| BUV395        | HLA-DR   | BD biosciences | 564040 |
| L/D blue      | L/D      |                |        |
| BUV496        | CD56     | BD biosciences | 750479 |
| BUV563        | CD27     | BD biosciences | 748705 |
| BUV615        | CD206    | BD biosciences | 751638 |
| BUV661        | CD10     | BD biosciences | 741600 |
| BUV737        | CD69     | BD biosciences | 612817 |
| BUV805        | CXCR4    | BD biosciences | 742043 |
| BV421         | CD303    | BioLegend      | 354212 |
| BV480         | Siglec 6 | BD biosciences | 747914 |
| BV510         | CD3      | BioLegend      | 344828 |
| BV570         | CD11b    | BioLegend      | 301325 |
| BV605         | CD1c     | BioLegend      | 331538 |
| BV650         | CCR7     | BioLegend      | 353234 |
| BV711         | CD25     | BioLegend      | 356138 |
| BV750         | CD163    | BD biosciences | 747185 |
| BV785         | CD16     | BioLegend      | 302046 |
| BB515         | CD141    | BioLegend      | 565084 |
| PerCP         | CXCR3    | BioLegend      | 353740 |
| PerCP Cy5.5   | CD83     | BioLegend      | 305320 |
| PE            | CLEC9A   | BioLegend      | 353804 |
| PE-Dazzle 594 | CD11c    | BioLegend      | 337228 |
| PE-Cy5        | CD86     | BioLegend      | 305408 |
| PE-Cy7        | CD80     | BioLegend      | 375408 |
| AF700         | CD19     | BioLegend      | 302226 |
| APC Cy7       | CD14     | BioLegend      | 301820 |
| APC fire 810  | CD38     | BioLegend      | 303550 |

Table S2. The information of peptide pools used in the study

| Viral protein  | Peptide pool name                              | Cat #           | Vendor  |
|----------------|------------------------------------------------|-----------------|---------|
| SARS-CoV2-N    | PepMix™ SARS-CoV-2 (NCAP)                      | PM-WCPV-NCAP    | JPT     |
| SARS-CoV2-VME  | PepMix™ SARS-CoV-2 (VME1)                      | PM-WCPV-VME     | JPT     |
| SARS-CoV2-S    | PepMix™ SARS-CoV-2 (Spike Glycoprotein SUB1)   | PM-WCPV-S-SU1-1 | JPT     |
|                | PepMix™ SARS-CoV-2 (Spike Glycoprotein SUB2)   | PM-WCPV-S-SU2-1 | JPT     |
| SARS-CoV2-VEMP | PepMix™ SARS-CoV-2 (VEMP)                      | PM-WCPV-VEMP-1  | JPT     |
| HKU1-S         | PepMix™ HCoV- HKU1 (Spike Glycoprotein)        | PM-HKU1-S       | JPT     |
| 229E-S         | PepMix™ HCoV-229E (Spike Glycoprotein)         | PM-229E-S       | JPT     |
| NL63-S         | PepMix™ HCoV-NL63 (Spike Glycoprotein)         | PM-NL63-S-1     | JPT     |
| OC43-S         | PepMix™ HCoV-OC43 (Spike Glycoprotein)         | PM-OC43-S       | JPT     |
| CMV            | CMV peptide pool for human CD4 and CD8 T cells | 3619-1          | Mabtech |

Table S3. Antibodies used for T cell staining

| fluorochrome   | Antigen      | Vendor         | Cat#       |
|----------------|--------------|----------------|------------|
| Surface        |              |                |            |
| BUV395         | HLA-DR       | BD biosciences | 564040     |
| L/D blue       |              | ThermoFisher   | L23105     |
| BUV563         | CD27         | BD biosciences | 748705     |
| BUV661         | PD1          | BD biosciences | 750260     |
| BUV737         | CD69         | BD biosciences | 612817     |
| BUV805         | CD28         | BD biosciences | 742037     |
| BV421          | CD3          | BD biosciences | 562877     |
| BV510          | CD62L        | BioLegend      | 304844     |
| BV650          | CCR7         | BioLegend      | 353234     |
| BV750          | CXCR3        | BD biosciences | 746895     |
| BV785          | CD107a       | BioLegend      | 328644     |
| Spark Blue 550 | CD4          | BioLegend      | 344656     |
| PerCP          | CD8a         | BioLegend      | 301030     |
| PE Cy5         | CTLA4        | BD biosciences | 555854     |
| PE Cy5.5       | CD45RA       | ThermoFisher   | MHCD45RA18 |
| APC Fire 810   | CD38         | BioLegend      | 303550     |
| Intracellular  |              |                |            |
| BUV615         | CD154        | BD biosciences | 751177     |
| BV480          | Ki67         | BD biosciences | 566109     |
| BV711          | IL13         | BD biosciences | 564288     |
| BB700          | FoxP3        | BD biosciences | 566526     |
| PE             | IL21         | BioLegend      | 513004     |
| PE Dazzle 594  | IL4          | BioLegend      | 500832     |
| PE Cy7         | IFN $\gamma$ | BioLegend      | 506518     |
| APC            | Granzyme B   | ThermoFisher   | MHGB05     |
| APC-R700       | IL17A        | BD biosciences | 565163     |
| APC Fire750    | IL2          | BioLegend      | 500352     |

# Table S4. COVID-19 study participant characteristics

| Code | Acute illness status | Sex             | Race/ Ethnicity | Age (years) | Days hospitalized for COVID19 | Scale                               | Comorbidities                                           | Treatment/ Routine medications/ Other                                | Vaccinated before collection |
|------|----------------------|-----------------|-----------------|-------------|-------------------------------|-------------------------------------|---------------------------------------------------------|----------------------------------------------------------------------|------------------------------|
| P01  | Inpatient            | Male            | Black           | 52          | 5                             | Conventional O2                     | Obesity                                                 |                                                                      | Yes                          |
| P03  |                      | Female          | Black           | 45.4        | 7                             |                                     | Borderline HTN                                          |                                                                      | No                           |
| P05  |                      | Male            | Black           | 47.5        | 4                             |                                     | Diabetes, asthma, obesity                               | ICS/LABA                                                             | No                           |
| P06  |                      | Male            | White           | 49.2        | 6                             |                                     | Chronic neurologic disorder                             | Ocrelizumab, InCS                                                    | No                           |
| P30  |                      | Male            | White           | 28.8        | 15                            |                                     | Leukemia, asthma, surgical asplenia                     | <b>Dexamethasone, remdesivir, ICS</b>                                | Yes                          |
| P17  |                      | Female          | Black           | 61.7        | 12                            | High flow O2                        | Chronic cardiac, pulmonary, and kidney disease, obesity | Dialysis                                                             | No                           |
| P20  |                      | Female          | Asian           | 52.7        | 8                             |                                     | Asthma                                                  | <b>convalescent plasma, prednisone, ICS</b>                          | Yes                          |
| P38  |                      | Male            | Hispanic        | 40.5        | 13                            |                                     |                                                         | <b>remdesivir</b>                                                    | No                           |
| P09  |                      | Female          | Black           | 56.2        | 13                            | Invasive O2                         | Graves disease, obesity                                 | InCS                                                                 | No                           |
| P41  |                      | Male            | Asian           | 21.4        | 4                             |                                     | Chronic hematologic disease                             | <b>Ionotropes, remdesivir, renal replacement therapy, lisinopril</b> | Yes                          |
| P02  |                      | Male            | Black           | 54.5        | 8                             |                                     |                                                         | Obesity                                                              |                              |
| P04  |                      | Female          | Black           | 45.3        | 4                             | No O2                               | Obesity                                                 | Ibuprofen, Smoker                                                    | No                           |
| P07  |                      | Male            | White           | 57.6        | 2                             |                                     | HIV                                                     | Bictegravir/FTC/TAF, ICS                                             | Yes                          |
| P08  |                      | Female          | Black           | 72.4        | 5                             |                                     | Diabetes                                                | lisinopril                                                           | Yes                          |
| P11  | Female               | White           | 42              |             | Chronic neurologic disorder   |                                     |                                                         | No                                                                   |                              |
| P14  | Male                 | White           | 54.4            |             | Minimal symptoms              | Cancer, HIV                         | valacyclovir, ABC/3TC/ dolutegravir, vape               | Yes                                                                  |                              |
| P28  | Male                 | White           | 52.6            |             |                               | Asthma                              | InCS                                                    | Yes                                                                  |                              |
| P32  | Female               | Hispanic        | 40              |             |                               | Obesity                             |                                                         | Yes                                                                  |                              |
| P13  | Female               | White           | 56.3            |             | Limited activity              | Cancer                              |                                                         | Yes                                                                  |                              |
| P23  | Female               | Black           | 46.4            |             |                               |                                     |                                                         | Yes                                                                  |                              |
| P25  | Male                 | White           | 60.2            |             |                               |                                     |                                                         | No                                                                   |                              |
| P33  | Male                 | Asian           | 36.2            |             |                               |                                     |                                                         | No                                                                   |                              |
| P34  | Male                 | White           | 39.3            |             |                               |                                     |                                                         | No                                                                   |                              |
| P35  | Male                 | Native Hawaiian | 49.1            |             |                               |                                     | losartan                                                | Yes                                                                  |                              |
| P36  | Female               | Hispanic        | 40.3            |             |                               | Diabetes                            | losartan                                                | Yes                                                                  |                              |
| P37  | Male                 | Hispanic        | 32.9            |             |                               |                                     |                                                         | No                                                                   |                              |
| P39  | Female               | Multiple        | 44.6            |             |                               |                                     |                                                         | Yes                                                                  |                              |
| P40  | Female               | Hispanic        | 46              |             |                               | Mild liver disease, cancer, obesity |                                                         | Yes                                                                  |                              |
| P42  | Male                 | Hispanic        | 20.1            |             |                               |                                     | No                                                      |                                                                      |                              |

**Abbreviations:**

- ICS= inhaled corticosteroid,
- LABA=long acting beta2-adrenergic agonist,
- InCS=intranasal corticosteroids
- HTN=hypertension
- ACE=angiotensin converting enzyme
- ABC=abacavir
- 3TC=lamivudine
- FTC=emtricitabine
- TAF=tenofovir alafenamide

Fig S1

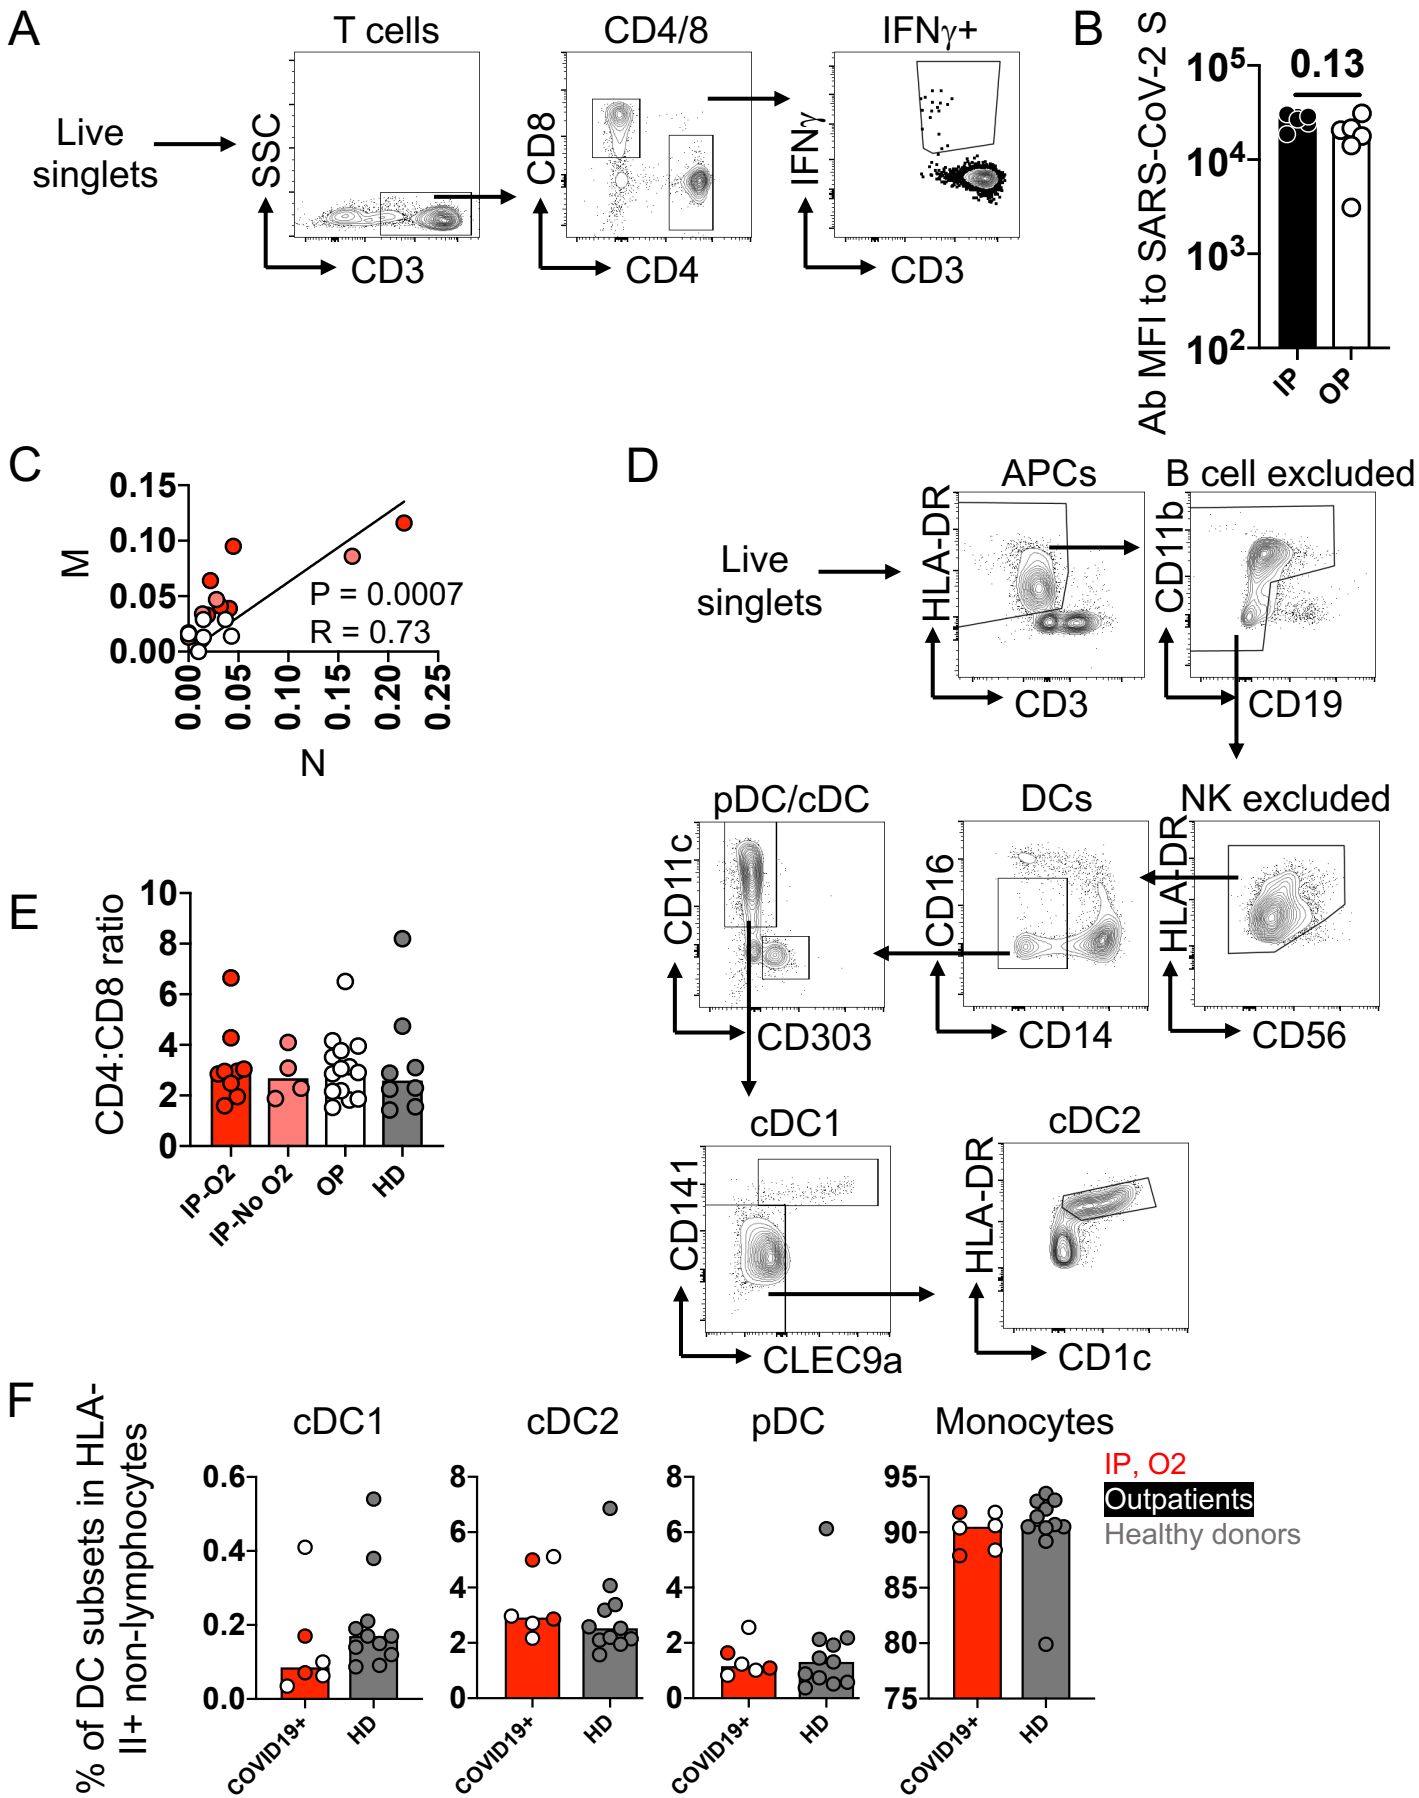

**Supplemental Figure 1. Investigation of antigen presenting cells (APCs) and major T cell subsets. A.** Gating strategy to characterize CD4 and CD8 T cells and antigen-specific T cells by expression of IFN $\gamma$ . **B.** Antibodies to SARS-CoV-2 spike glycoprotein at 12-months post-infection. Participants vaccinated before blood collection were excluded. **C.** Correlation of T cell responses to SARS-CoV-2 N and M. P value in the plot indicates significance by Spearman rank correlation. R value in the plot indicates coefficient. **D.** Gating strategy to characterize the classical APCs in PBMCs. **E.** CD4:CD8 ratio among groups were similar. Red dots represent inpatients with oxygen supplementation, pink dots represent inpatients without oxygen supplementation, open dots represent outpatients, grey dots represent healthy donors, respectively. **F.** Frequencies of APC subsets including cDC1 and 2, plasmacytoid DCs, and monocytes in HLA-II+CD19-non-lymphocytes between COVID-19 patients and healthy donors.

Fig S2

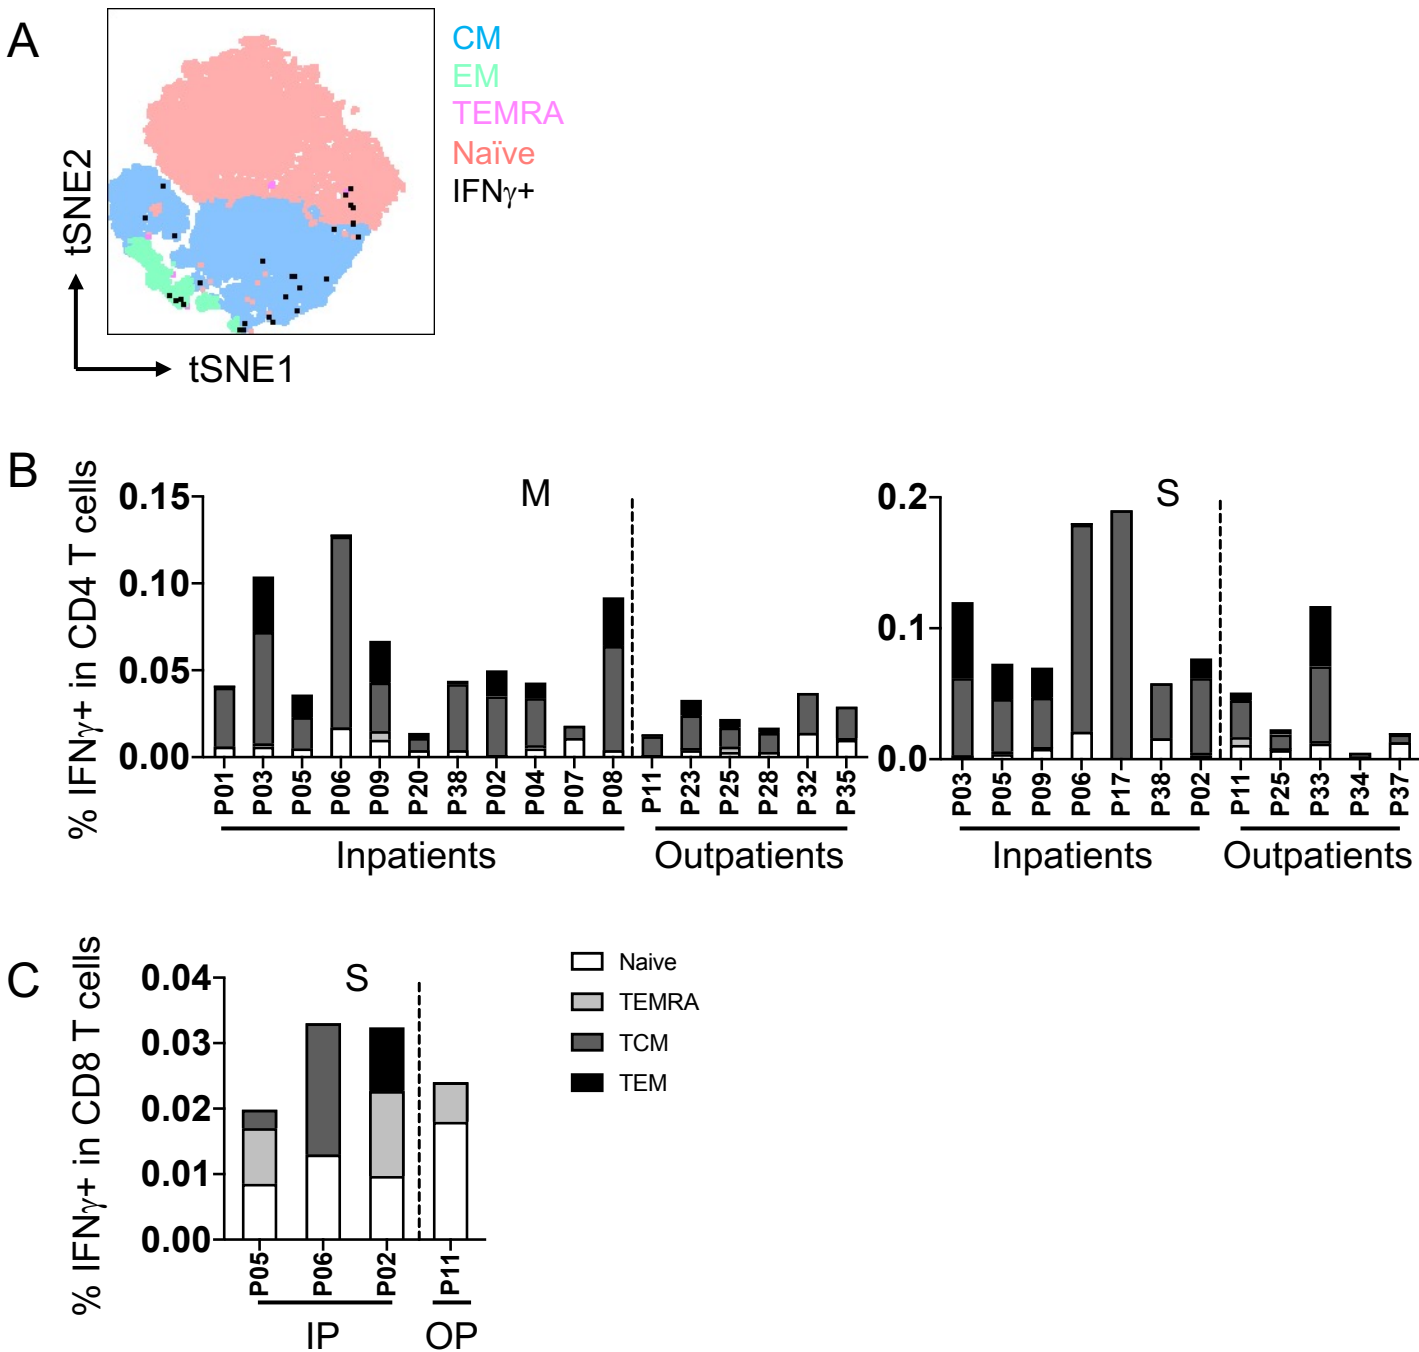

**Supplemental Figure 2. Memory phenotype characterization of SARS-CoV-2-specific T cell responses.** **A.** tSNE using memory markers CCR7, CD45RA, CD62L, CD27, and CD28 to show that IFN $\gamma$  CD4 T cells were mainly CCR7+CD45RA-CD28+CD27+, indicating central memory phenotype. **B.** Similar to N-specific CD4 T cell memory phenotypes, M and S-specific CD4 T cells were mainly central memory. **C.** Similar to N-specific CD8 T cell memory phenotypes, S-specific CD8 T cells exhibited diverse memory phenotypes.

Fig S3

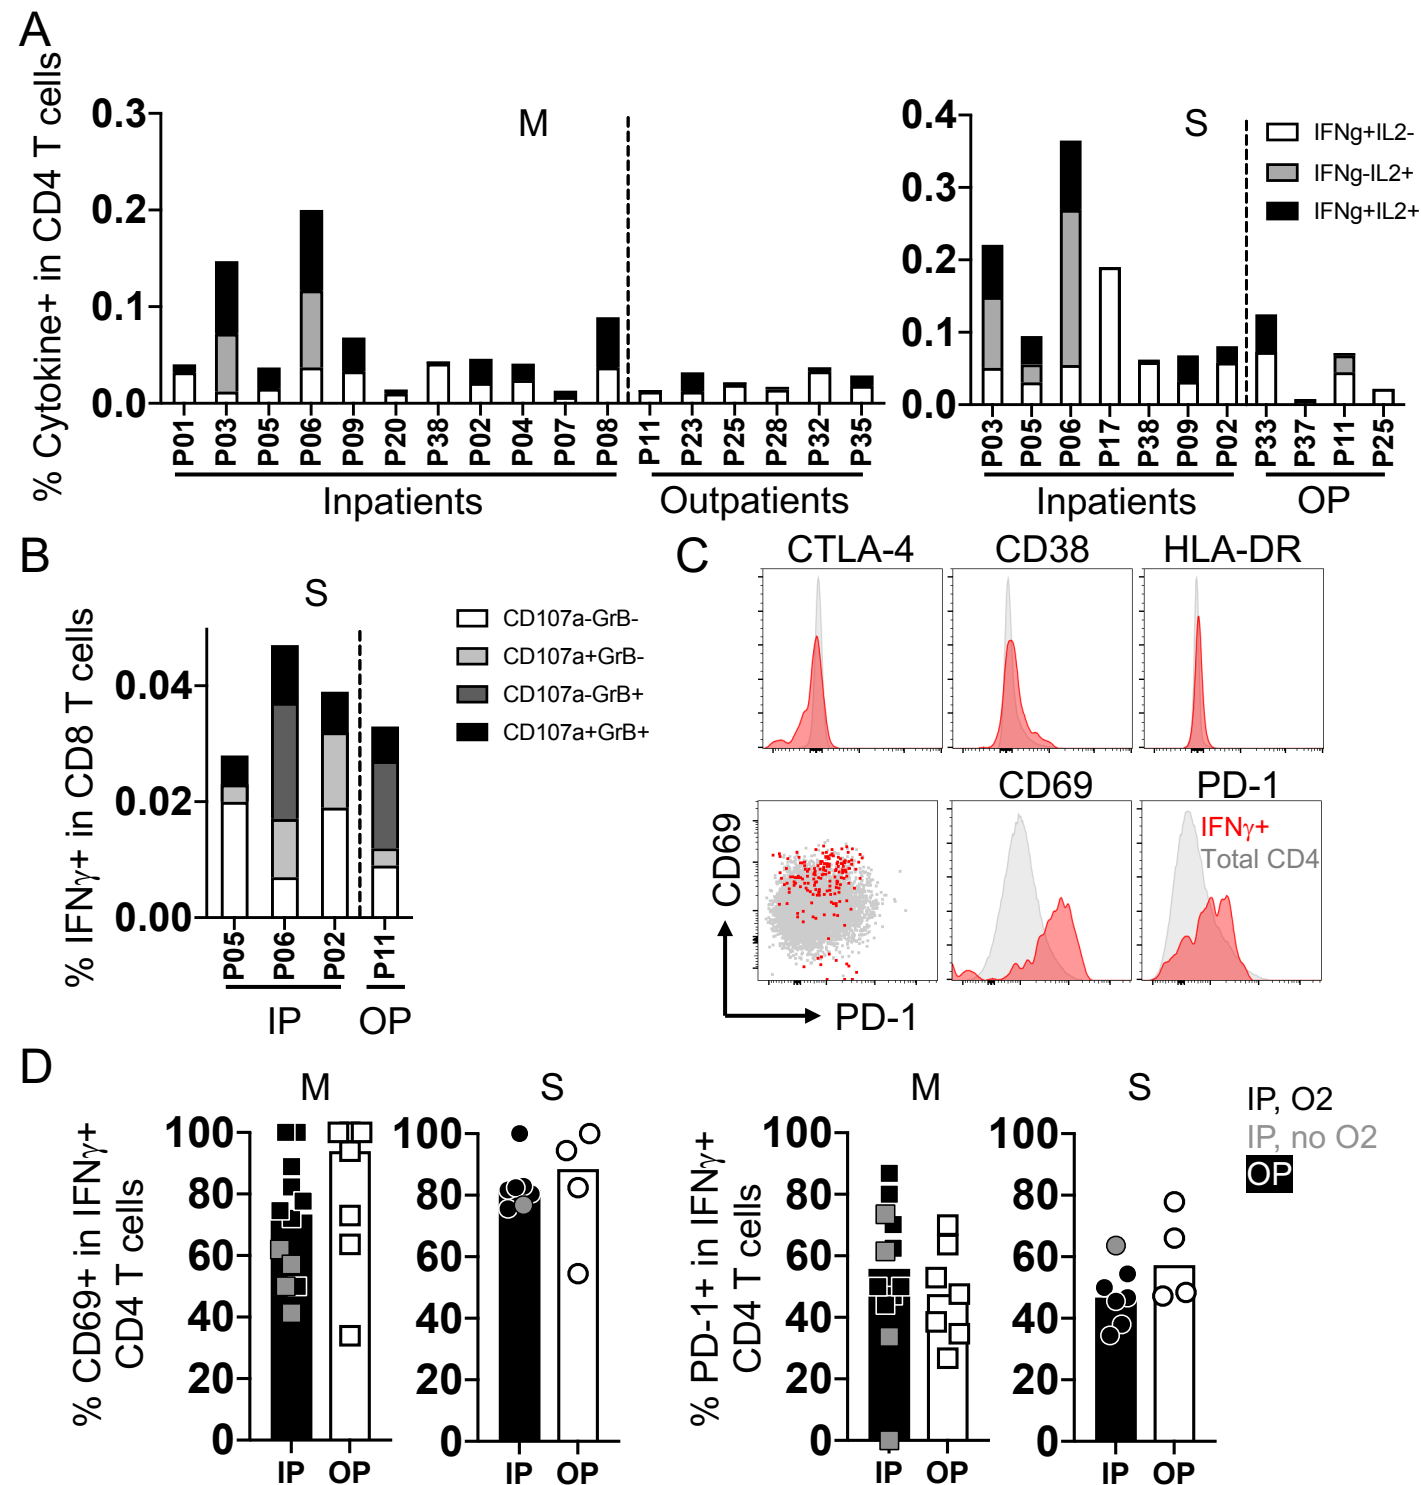

**Supplemental Figure 3. Polyfunctionality, cytotoxicity, and activation of SARS-CoV-2-specific CD4 or CD8 T cells.** **A.** Polyfunctionality of CD4 T cell responses to SARS-CoV-2 M and S proteins measured by IL2 and IFN $\gamma$ . **B.** Cytotoxicity of IFN $\gamma$ + CD8 T cells to SARS-CoV-2 S protein measured by expression of intracellular Granzyme B and membrane CD107a. **C.** Histograms of the expression of T cell activation markers CTLA-4, CD38, HLA-DR, CD69, and PD-1, and a dot plot of expression of CD69 and PD-1 in parent and IFN $\gamma$ + CD4 T cells. Red indicates IFN $\gamma$ + CD4 T cells; grey indicates parent CD4 T cells. **D.** The frequencies of CD69 and PD-1 in SARS-CoV-2 M and S-specific IFN $\gamma$ + CD4 T cells in each patient group. Grey dots in the inpatient group represent inpatients without oxygen supplementation.
